# Supplementary material for: The Human Gut Microbiome as a Screening Tool for Colorectal Cancer
Source: Oxford University Press journal article supplement (doi:10.1158/1940-6207.capr-14-0129), 2014-08-08
Supplement: 19406207capr140129-sup-130283_1_supp_2501447_n6lxrw.docx [file 19406207capr140129-sup-130283_1_supp_2501447_n6lxrw.docx]

**Supplemental Figure 2. LeFSe analysis for healthy vs. carcinoma clinical groups.** LDA values are represented for OTUs enriched in healthy and carcinoma clinical groups.
